# Supplementary material
Source: Elsevier journal article supplement (https://www.sciencedirect.com/science/article/pii/S1665268120300089)
Supplement: mmc2 [file S1665268120300089:mmc2.docx]

**Supplementary table 1.** **Rotterdam criteria frequency in Mexican women with PCOS and BMI <25** **and ≥25.** Polycystic ovary syndrome (PCOS),body mass index (BMI), hyperandrogenism (HA), polycystic ovary morphology (PCOM).

| **Rotterdam criteria**  **(%)** | **PCOS-BMI <25** | **PCOS-BMI ≥25** |
| --- | --- | --- |
| **Clinical HA** | 86.9 (20/23) | 84.6 (22/26) |
| **Oligo-anovulation** | 91.3 (21/23) | 100 (26/26) |
| **PCOM** | 82.6 (19/23) | 88.5 (23/26) |
| **Phenotype A** | 60.8 (14/23) | 69.2 (18/26) |
